# Supplementary material for: Melanocortin 1 receptor regulates cholesterol and bile acid metabolism in the liver
Source: eLife. 2023 Jul 25;12:e84782. doi: 10.7554/eLife.84782 (PMC10368426; doi:10.7554/eLife.84782)
Supplement: Figure 3—figure supplement 1—source data 1. [file elife-84782-fig3-figsupp1-data1.xlsx]

## Sheet: Sheet1
Raw data table for Figure 3-figure supplement 1
Data is expressed as ng analyte per mg liver tissue
	Genotype
	Alb-Cre	Mc1r flox	TaMCA	TwMCA	TbMCA	THCA	TUDCA	THDCA	TCA	wMCA	GHDCA	aMCA	GCA	7-OXO-DCA	bMCA	TCDCA	HCA	TDCA	UDCA	CA	HDCA	TLCA	CDCA	DCA
58	+/- (het)	fl/- (het)	4.26762	47.2374	4.09197	0.0388896	0.896879	1.26538	14.0102	1.72756	0.00538835	0.24279	0.153859	0.0175724	1.89261	1.12528	0.00730041	1.87891	0.148186	0.934643	0.350244	0.0338176	0.0254238	0.0183117
66	+/- (het)	fl/- (het)	1.76283	21.3713	1.52387	0.0338722	0.560847	0.35349	7.19793	0.736219	0.00335018	0.106906	0.0342171	0.00740107	0.70333	0.889266	0.0064505	1.72549	0.0955858	0.28798	0.100919	0.0507449	0.038962	0.450044
75	+/- (het)	fl/- (het)	2.3731	24.4983	2.22958	0.0383486	0.732019	0.551249	9.20735	0.726126	0.00377259	0.15558	0.0362775	0.0086053	0.629351	0.971168	0.00737722	2.04723	0.0880338	0.556346	0.125323	0.0835384	0.0512695	0.0322947
76	+/- (het)	fl/- (het)	1.90688	18.6432	2.16092	0.0297993	0.845737	0.297512	7.06361	0.392212	0.00365565	0.0819343	0.0249197	0.00909437	0.396733	1.01942	0.00602007	1.4834	0.0703526	0.221994	0.0437477	0.0922226	0.0388997	0.0111424
88	+/- (het)	fl/- (het)	4.38575	25.3467	4.83664	0.0312112	1.28754	0.615006	12.0781	0.546469	0.00415022	0.190795	0.117191	0.0188606	1.04212	1.11773	0.00661937	2.3613	0.12852	0.603782	0.0944078	0.0570074	0.0453486	0.0225563
67	+/- (het)	fl/fl (homo)	1.8388	32.0302	2.23738	0.0440744	0.580138	0.67635	8.03524	1.00511	0.0036857	0.145527	0.0320982	0.00777124	0.838664	0.793377	0.00834814	1.39316	0.0957878	0.374978	0.175308	0.0539471	0.0258556	0.0127464
74	+/- (het)	fl/fl (homo)	2.09755	22.647	3.00435	0.0271223	1.12134	0.440143	5.97649	0.668217	0.00352018	0.0932084	0.0182952	0.00893923	0.827484	0.887293	0.0060119	1.50892	0.151152	0.322785	0.0920997	0.0694578	0.0265331	0.0203908
89	+/- (het)	fl/fl (homo)	1.91987	19.1017	2.42648	0.0287398	0.605795	0.26615	6.23922	0.681215	0.00329219	0.106931	0.0408898	0.00979684	0.791451	0.738419	0.00662241	1.02511	0.101405	0.35624	0.0608977	0.0429849	0.0535826	0.0159943
57	+/- (het)	fl/fl (homo)	3.08346	38.1172	2.55752	0.0514405	0.727757	0.667252	11.2524	1.79942	0.00404231	0.328621	0.0635072	0.0236938	1.75377	1.61723	0.00973338	1.60967	0.209977	0.682534	0.400618	0.0397607	0.0968017	0.0113084
98	+/- (het)	fl/fl (homo)	1.15261	14.3461	1.1836	0.0351171	0.608764	0.178358	5.64743	0.734767	0.00354342	0.123453	0.0255296	0.0134906	0.698394	0.921694	0.00855188	0.959777	0.15474	0.313811	0.0831675	0.0300158	0.0777364	0.0112849
TaMCA	taurine-conjugated alpha-muricholic acid
TwMCA	taurine-conjugated omega-muricholic acid
TbMCA	taurine-conjugated beta-muricholic acid
THCA	taurine-conjugated hyocholic acid
TUDCA	taurine-conjugated ursodeoxycholic acid
THDCA	taurine-conjugated hyodeoxycholic acid
TCA	taurine-conjugated cholic acid
wMCA	omega-muricholic acid
GHDCA	glycine-conjugated hyodeoxycholic acid
aMCA	alpha-muricholic acid
GCA	glycine-conjugated cholic acid
7-OXO-DCA	7-oxo-deoxycholic acid
bMCA	beta-muricholic acid
TCDCA	taurine-conjugated chenodeoxycholic acid
HCA	hyocholic acid
TDCA	taurine-conjugated deoxycholic acid
UDCA	ursodeoxycholic acid
CA	cholic acid
HDCA	hyodeoxycholic acid
TLCA	taurine-conjugated litocholic acid
CDCA	chenodeoxycholic acid
DCA	deoxycholic acid
