# Supplementary material for: Melanocortin 1 receptor regulates cholesterol and bile acid metabolism in the liver
Source: eLife. 2023 Jul 25;12:e84782. doi: 10.7554/eLife.84782 (PMC10368426; doi:10.7554/eLife.84782)
Supplement: Figure 3—figure supplement 1—source data 2. [file elife-84782-fig3-figsupp1-data2.xlsx]

## Sheet: Sheet1
Raw data table for Figure 3-figure supplement 1
Data is expressed as ng analyte per mg dried feces
	Genotype
Sample	Alb-Cre	Mc1r flox	TDHCA	TaMCA	TwMCA	TbMCA	GDHCA	THCA	TUDCA	THDCA	TCA	DHCA	GUDCA	wMCA	GHCA	GHDCA	aMCA	GCA	7-OXO-DCA	bMCA	TCDCA	7-oxo-HDCA	HCA	TDCA	UDCA	CA	HDCA	GCDCA	GDCA	12-OXO-LCA	TLCA	CDCA	DCA	GLCA	LCA
1	+/- (het)	fl/fl (homo)	N/A	0.0371329	1.13678	0.128167	N/A	N/A	0.0120437	N/A	0.269535	0.321689	N/A	53.0616	N/A	N/A	4.63444	0.0132659	1.61261	9.35943	0.0460427	N/A	0.637474	0.0135171	1.18558	6.20552	3.19076	N/A	N/A	15.6516	N/A	3.36092	5.29393	N/A	3.52241
2	+/- (het)	fl/fl (homo)	N/A	0.137894	5.03054	0.782752	N/A	0.00676812	0.0925843	0.00223674	1.33363	1.13818	N/A	130.63	N/A	N/A	11.2472	0.0162483	15.7993	22.8526	0.166235	N/A	2.78801	0.0419924	3.57978	29.9972	3.80908	N/A	N/A	30.0537	N/A	5.72813	8.57202	N/A	2.41276
3	+/- (het)	fl/fl (homo)	N/A	0.0289078	1.89084	0.842472	N/A	0.00260649	0.149575	0.0348914	0.518937	0.170435	N/A	127.714	N/A	N/A	10.2035	0.039727	4.39641	23.155	0.234814	N/A	2.01081	0.108835	2.88411	14.696	3.98949	N/A	N/A	42.9632	N/A	6.23254	6.99775	N/A	4.30045
4	+/- (het)	fl/fl (homo)	N/A	0.0933101	2.10588	0.307032	N/A	0.00187552	0.0491982	0.0178005	1.08573	0.142102	N/A	85.1123	N/A	N/A	8.10332	0.0375844	6.43082	11.3806	0.35038	N/A	1.36821	0.108367	1.56408	11.5824	5.93727	N/A	N/A	39.3965	N/A	5.41316	9.31487	N/A	2.78508
5	+/- (het)	fl/- (het)	N/A	0.0472408	2.30134	0.290441	N/A	0.00183407	0.0255352	N/A	0.519288	0.0384736	N/A	129.709	N/A	N/A	12.2338	0.0353349	6.05996	21.1205	0.0808775	N/A	2.49335	0.0215567	2.97855	13.5829	8.12067	N/A	N/A	64.4742	N/A	7.02018	9.90245	N/A	5.26599
6	+/- (het)	fl/- (het)	N/A	0.341922	8.50042	1.39938	N/A	0.0197493	0.233813	0.122102	2.36078	0.0824891	N/A	148.781	N/A	N/A	15.4291	0.0748343	9.42494	29.909	0.246246	N/A	4.38002	0.181628	4.65305	20.9195	8.54051	N/A	N/A	101.216	N/A	12.1381	9.08072	N/A	7.528
7	+/- (het)	fl/- (het)	N/A	0.451762	9.22388	1.34963	N/A	0.035687	0.329476	0.0862543	5.16024	0.0871548	N/A	205.235	N/A	N/A	18.5934	0.102731	15.5626	29.2075	0.471533	N/A	7.77211	0.567509	4.82812	29.3613	8.00222	N/A	N/A	104.249	N/A	13.8752	12.1996	N/A	7.85409
8	+/- (het)	fl/- (het)	N/A	0.0832062	2.51274	0.351333	N/A	0.000332238	0.0691412	N/A	0.782474	0.115451	N/A	111.279	N/A	N/A	11.041	0.014946	8.74808	23.2635	0.110365	N/A	2.49155	0.0390455	3.57267	18.7907	5.04823	N/A	N/A	52.8644	N/A	5.47482	7.36928	N/A	3.87586
TDHCA	taurine-conjugated dihydroxycholestanoic acid
TaMCA	taurine-conjugated alpha-muricholic acid
TwMCA	taurine-conjugated omega-muricholic acid
TbMCA	taurine-conjugated beta-muricholic acid
GDHCA	glycine-conjugated dihydroxycholestanoic acid
THCA	taurine-conjugated hyocholic acid
TUDCA	taurine-conjugated ursodeoxycholic acid
THDCA	taurine-conjugated hyodeoxycholic acid
TCA	taurine-conjugated cholic acid
DHCA	dihydroxycholestanoic acid
GUDCA	glycine-conjugated ursodeoxycholic acid
wMCA	omega-muricholic acid
GHCA	glycine-conjugated hyocholic acid
GHDCA	glycine-conjugated hyodeoxycholic acid
aMCA	alpha-muricholic acid
GCA	glycine-conjugated cholic acid
7-OXO-DCA	7-oxo-deoxycholic acid
bMCA	beta-muricholic acid
TCDCA	taurine-conjugated chenodeoxycholic acid
7-oxo-HDCA	7-oxo-hyodeoxycholic acid
HCA	hyocholic acid
TDCA	taurine-conjugated deoxycholic acid
UDCA	ursodeoxycholic acid
CA	cholic acid
HDCA	hyodeoxycholic acid
GCDCA	glycine-conjugated chenodeoxycholic acid
GDCA	glycine-conjugated deoxycholic acid
12-OXO-LCA	12-oxo-litocholic acid
TLCA	taurine-conjugated litocholic acid
CDCA	chenodeoxycholic acid
DCA	deoxycholic acid
GLCA	glycine-conjugated litocholic acid
LCA	litocholic acid
