# Supplementary material for: Melanocortin 1 receptor regulates cholesterol and bile acid metabolism in the liver
Source: eLife. 2023 Jul 25;12:e84782. doi: 10.7554/eLife.84782 (PMC10368426; doi:10.7554/eLife.84782)
Supplement: Figure 3—source data 1. [file elife-84782-fig3-data1.xlsx]

## Sheet: Sheet1
Raw data table for Figure 3A, D, E, F & G
Data is expressed as ng analyte per ml plasma
	Genotype
Sample	Alb-Cre	Mc1r flox	TDHCA	TaMCA	TwMCA	TbMCA	GDHCA	THCA	TUDCA	THDCA	TCA	DHCA	GUDCA	wMCA	GHCA	GHDCA	aMCA	GCA	7-OXO-DCA	bMCA	TCDCA	7-oxo-HDCA	HCA	TDCA	UDCA	CA	HDCA	GCDCA	12-OXO-LCA	TLCA	CDCA	DCA	GLCA	LCA
58	+/- (het)	fl/- (het)	N/A	14.7587	294.43	29.4822	N/A	N/A	6.72019	11.5216	40.8952	5.26498	1.1389	24.4947	2.74788	3.3015	N/A	4.04543	3.3424	7.24135	4.57884	N/A	N/A	10.6685	7.15761	23.5326	8.31565	1.5129	N/A	4.52992	N/A	12.3681	2.19102	3.28167
76	+/- (het)	fl/- (het)	1.20111	5.68155	265.062	5.47239	N/A	N/A	5.14782	6.93792	7.6291	5.14488	1.14345	50.4425	2.74852	N/A	8.98239	3.83949	7.91651	23.2532	3.29814	7.16456	4.32231	11.8595	13.6451	97.6754	10.242	1.55783	14.0088	4.74917	10.6007	21.8897	2.18321	3.56535
67	+/- (het)	fl/fl (homo)	1.20145	7.07249	130.524	15.6406	N/A	N/A	5.69483	5.69334	15.4326	5.21468	1.12768	41.6028	2.74812	N/A	N/A	3.43031	2.35202	9.56801	3.9852	N/A	N/A	6.35373	9.06028	18.2301	8.63236	1.50707	N/A	4.50454	N/A	11.8481	2.17134	3.05344
89	+/- (het)	fl/fl (homo)	1.20123	8.61884	56.4201	9.35528	N/A	N/A	5.2638	3.86773	12.9133	5.16652	1.13513	13.9953	N/A	N/A	N/A	3.37327	1.97227	6.12541	3.85804	N/A	N/A	5.2638	6.52412	7.21497	6.16426	1.52997	N/A	N/A	N/A	0.846	2.18128	2.76778
98	+/- (het)	fl/fl (homo)	1.20187	N/A	11.9679	N/A	N/A	N/A	4.97322	3.24642	3.86369	5.13498	1.13016	12.4653	N/A	N/A	N/A	3.30699	1.7738	4.42583	3.13062	N/A	N/A	4.68226	6.18738	3.47594	N/A	1.47669	N/A	N/A	N/A	< 0	2.17044	2.9626
74	+/- (het)	fl/fl (homo)	1.20151	4.90262	14.2176	4.88458	N/A	N/A	4.9984	3.33104	3.95082	5.1392	1.13101	19.7172	N/A	N/A	N/A	3.29469	2.05227	7.1473	3.13698	N/A	N/A	4.75774	7.05784	4.68878	6.84053	1.49037	N/A	N/A	N/A	2.33846	2.17062	2.90039
97	+/- (het)	fl/fl (homo)	1.20151	4.90262	14.2176	4.88458	N/A	N/A	4.9984	3.33104	3.95082	5.1392	1.13101	19.7172	N/A	N/A	N/A	3.29469	2.05227	7.1473	3.13698	N/A	N/A	4.75774	7.05784	4.68878	6.84053	1.49037	N/A	N/A	N/A	2.33846	2.17062	2.90039
75	+/- (het)	fl/- (het)	< 0	9.38102	190.946	12.328	N/A	N/A	5.97424	8.39355	29.8469	N/A	< 0	56.4968	< 0	N/A	4.05683	1.81535	5.50234	19.9659	5.27104	N/A	2.62417	10.756	4.6251	51.2279	< 0	< 0	N/A	3.49062	N/A	24.6712	< 0	16.0604
66	+/- (het)	fl/- (het)	< 0	11.6941	206.942	13.0927	N/A	N/A	6.57413	7.76049	41.0379	N/A	< 0	46.9894	< 0	N/A	3.01556	1.7339	4.24872	11.1033	6.48627	N/A	2.62811	11.9613	3.86486	17.5668	< 0	< 0	N/A	3.44698	N/A	41.5654	< 0	11.0617
TDHCA	taurine-conjugated dihydroxycholestanoic acid
TaMCA	taurine-conjugated alpha-muricholic acid
TwMCA	taurine-conjugated omega-muricholic acid
TbMCA	taurine-conjugated beta-muricholic acid
GDHCA	glycine-conjugated dihydroxycholestanoic acid
THCA	taurine-conjugated hyocholic acid
TUDCA	taurine-conjugated ursodeoxycholic acid
THDCA	taurine-conjugated hyodeoxycholic acid
TCA	taurine-conjugated cholic acid
DHCA	dihydroxycholestanoic acid
GUDCA	glycine-conjugated ursodeoxycholic acid
wMCA	omega-muricholic acid
GHCA	glycine-conjugated hyocholic acid
GHDCA	glycine-conjugated hyodeoxycholic acid
aMCA	alpha-muricholic acid
GCA	glycine-conjugated cholic acid
7-OXO-DCA	7-oxo-deoxycholic acid
bMCA	beta-muricholic acid
TCDCA	taurine-conjugated chenodeoxycholic acid
7-oxo-HDCA	7-oxo-hyodeoxycholic acid
HCA	hyocholic acid
TDCA	taurine-conjugated deoxycholic acid
UDCA	ursodeoxycholic acid
CA	cholic acid
HDCA	hyodeoxycholic acid
GCDCA	glycine-conjugated chenodeoxycholic acid
12-OXO-LCA	12-oxo-litocholic acid
TLCA	taurine-conjugated litocholic acid
CDCA	chenodeoxycholic acid
DCA	deoxycholic acid
GLCA	glycine-conjugated litocholic acid
LCA	litocholic acid
