# Supplementary material for: Melanocortin 1 receptor regulates cholesterol and bile acid metabolism in the liver
Source: eLife. 2023 Jul 25;12:e84782. doi: 10.7554/eLife.84782 (PMC10368426; doi:10.7554/eLife.84782)
Supplement: Figure 5—figure supplement 1—source data 1. [file elife-84782-fig5-figsupp1-data1.xlsx]

## Sheet: Sheet1
Raw data table for Figure 5-figure supplement 1
Data is expressed as ng analyte per ml medium
	Treatment	TDHCA	TaMCA	TwMCA	TbMCA	GDHCA	THCA	TUDCA	THDCA	TCA	DHCA	GUDCA	wMCA	GHCA	GHDCA	aMCA	GCA	7-OXO-DCA	bMCA	TCDCA	7-oxo-HDCA	HCA	TDCA	UDCA	CA	HDCA	GCDCA	GDCA	12-OXO-LCA	TLCA	CDCA	DCA	GLCA	LCA
Sample 1	Control	0.2597	1.985	1.758	<0	<0	<0	<0	<0	6.206	<0	< 0	4.234	< 0	< 0	< 0	4.288	< 0	< 0	9.249	< 0	< 0	3.657	< 0	3.805	< 0	6.428	6.82	< 0	3.854	16.2	< 0	0.5959	< 0
Sample 2	Control	0.2707	1.979	1.702	<0	<0	<0	<0	<0	6.486	<0	< 0	<0	< 0	2.321	< 0	4.241	< 0	< 0	9.936	< 0	< 0	3.873	< 0	4.461	< 0	6.838	7.221	< 0	3.906	16.17	5.724	0.5647	< 0
Sample 3	Control	0.27	<0	2.695	<0	<0	<0	<0	<0	6.486	<0	< 0	<0	< 0	< 0	< 0	4.297	< 0	< 0	10.16	< 0	< 0	3.67	< 0	5.937	< 0	8.135	8.427	< 0	3.858	18.04	< 0	0.5672	< 0
Sample 4	Control	0.2652	<0	<0	<0	<0	<0	<0	<0	6.415	<0	< 0	<0	< 0	< 0	< 0	4.13	< 0	< 0	10.63	< 0	< 0	3.659	< 0	5.937	< 0	8.191	8.212	< 0	3.856	17.14	< 0	0.5861	3.694
Sample 5	⍺-MSH	0.2582	<0	<0	<0	<0	<0	<0	<0	6.466	<0	< 0	<0	< 0	< 0	< 0	4.264	< 0	< 0	9.787	< 0	< 0	3.676	< 0	5.847	< 0	7.741	8.002	< 0	3.887	16.95	< 0	0.5933	< 0
Sample 6	⍺-MSH	0.2503	<0	<0	<0	<0	<0	<0	<0	6.193	<0	< 0	<0	< 0	< 0	< 0	4.32	< 0	< 0	9.851	< 0	< 0	3.611	< 0	6.942	< 0	7.954	8.451	< 0	3.792	16.6	< 0	0.5981	< 0
Sample 7	⍺-MSH	0.2622	1.987	<0	<0	<0	<0	<0	<0	6.613	<0	< 0	<0	< 0	< 0	< 0	4.292	< 0	< 0	10.55	< 0	< 0	3.69	< 0	6.321	< 0	7.775	7.911	< 0	3.851	16.4	< 0	0.5841	< 0
Sample 8	⍺-MSH	0.2576	1.983	<0	<0	4.168	<0	<0	<0	6.724	<0	< 0	<0	< 0	< 0	< 0	4.405	< 0	< 0	10.34	< 0	< 0	3.667	< 0	6.973	< 0	8.528	8.537	< 0	3.876	15.76	< 0	0.5717	3.006
TDHCA	taurine-conjugated dihydroxycholestanoic acid
TaMCA	taurine-conjugated alpha-muricholic acid
TwMCA	taurine-conjugated omega-muricholic acid
TbMCA	taurine-conjugated beta-muricholic acid
GDHCA	glycine-conjugated dihydroxycholestanoic acid
THCA	taurine-conjugated hyocholic acid
TUDCA	taurine-conjugated ursodeoxycholic acid
THDCA	taurine-conjugated hyodeoxycholic acid
TCA	taurine-conjugated cholic acid
DHCA	dihydroxycholestanoic acid
GUDCA	glycine-conjugated ursodeoxycholic acid
wMCA	omega-muricholic acid
GHCA	glycine-conjugated hyocholic acid
GHDCA	glycine-conjugated hyodeoxycholic acid
aMCA	alpha-muricholic acid
GCA	glycine-conjugated cholic acid
7-OXO-DCA	7-oxo-deoxycholic acid
bMCA	beta-muricholic acid
TCDCA	taurine-conjugated chenodeoxycholic acid
7-oxo-HDCA	7-oxo-hyodeoxycholic acid
HCA	hyocholic acid
TDCA	taurine-conjugated deoxycholic acid
UDCA	ursodeoxycholic acid
CA	cholic acid
HDCA	hyodeoxycholic acid
GCDCA	glycine-conjugated chenodeoxycholic acid
GDCA	glycine-conjugated deoxycholic acid
12-OXO-LCA	12-oxo-litocholic acid
TLCA	taurine-conjugated litocholic acid
CDCA	chenodeoxycholic acid
DCA	deoxycholic acid
GLCA	glycine-conjugated litocholic acid
LCA	litocholic acid
